# Supplementary material for: Methanol oxidation on Au(332): an isothermal pulsed molecular beam study
Source: Royal Society of Chemistry journal article supplement (doi:10.1039/d1cp03436g), 2021-01-01
Supplement: d1cp03436g1.pdf [file d1cp03436g1.pdf]

Supporting Information

**Methanol oxidation on Au(332):  
An isothermal pulsed molecular beam study**

*Christoph D. Feldt<sup>1</sup>, Thorren Gimm<sup>1,2</sup>, Raphaell Moreira<sup>1</sup>, Wiebke Riedel<sup>1</sup>, Thomas Risse<sup>1</sup>*

<sup>1</sup>Institut für Chemie und Biochemie, Freie Universität Berlin, Arnimallee 22, 14195 Berlin, Germany

<sup>2</sup>Helmholtz-Zentrum Berlin für Materialien und Energie, Hahn-Meitner-Platz 1, 14109 Berlin, Germany

**Corresponding Authors**

\*E-Mail: [risse@chemie.fu-berlin.de](mailto:risse@chemie.fu-berlin.de); [wiebke.riedel@fu-berlin.de](mailto:wiebke.riedel@fu-berlin.de)

## Supplementary Figures

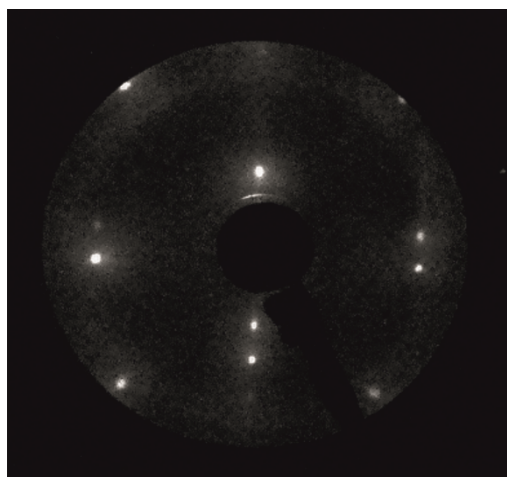

**Figure S1.** LEED measurement of clean Au(332) surface.

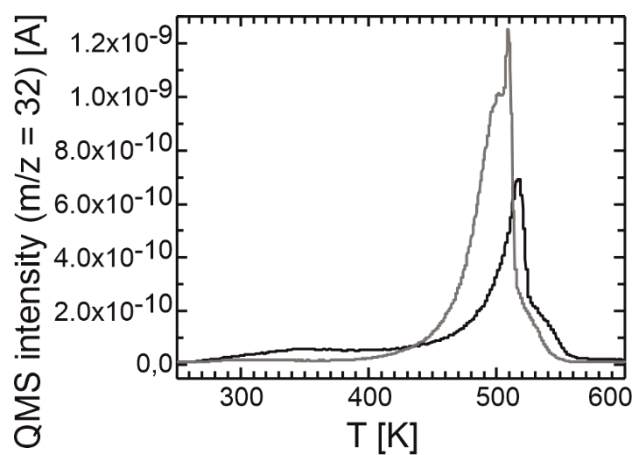

**Figure S2.** O<sub>2</sub> desorption from Au(332) after exposure to activated oxygen ( $0.4 \times 10^{13} \text{ s}^{-1} \text{ cm}^{-2}$ ) for 3000 s of the clean Au(332) surface (grey) corresponding to saturation coverage and for 725 s of the surface covered with formate after a pulsed isothermal methanol oxidation molecular beam experiment (black). Based on a calibration series, which was conducted with a slightly modified experimental setup preventing direct comparison of the absolute intensities, (80-85) % of the saturation coverage are expected to be reached after 700 s of oxygen exposure onto the clean Au(332) surface.

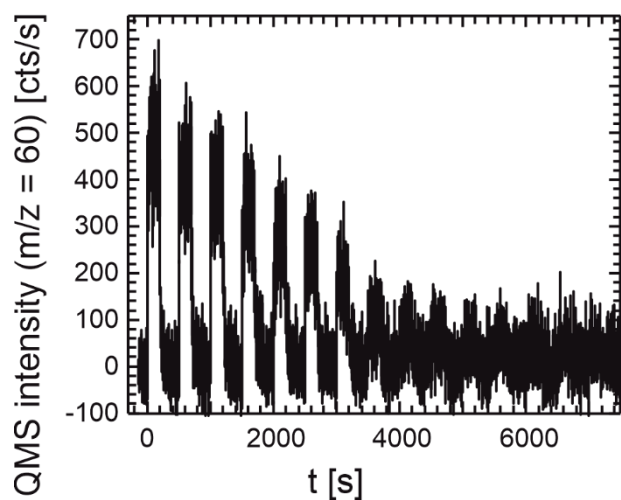

**Figure S3.** Methyl formate formation rate ( $m/z = 60$ ) of pulsed, isothermal MB experiment on the methanol oxidation at 230 K on Au(332) for a prolonged pulse sequence (15 pulses) by applying a constant flux of methanol ( $1.6 \times 10^{-7}$  mbar,  $4.2 \times 10^{13}$   $s^{-1}cm^{-2}$ ) and pulsing (200 s on, 300 s off) atomic oxygen ( $2.6 \times 10^{-3}$  ML/s,  $0.4 \times 10^{13}$   $s^{-1}cm^{-2}$ , approx. 0.5 ML per pulse) onto the surface.
